# Supplementary material for: Functionalized molybdenum disulfide (MoS2) monolayer as an efficient nanosensor towards toxic nitrogen containing gases
Source: Royal Society of Chemistry journal article supplement (doi:10.1039/d4en00072b), 2024-01-01
Supplement: d4en00072b1.pdf [file d4en00072b1.pdf]

## Supplementary Documents:

**Figure S1:** Device of functionalized MoS<sub>2</sub>: (a) before adsorption, (b) after adsorption of NO molecule, and (c) after adsorption of NO<sub>2</sub> molecule. (d) TDOS due to MoS<sub>2</sub> NR in pristine and (V<sub>S</sub>, Mn, Fe, Co, and Ni)-functionalized forms.

**Figure S2:** Differential resistance versus bias due to the adsorptions of NO and NO<sub>2</sub> gas molecules on five samples: (a) MoS<sub>2</sub>:V<sub>S</sub>, (b) MoS<sub>2</sub>:Mn, (c) MoS<sub>2</sub>:Fe, (d) MoS<sub>2</sub>:Co, and (e) MoS<sub>2</sub>:Ni.

**Figure S3:** Sensor response versus bias due to the adsorptions of NO and NO<sub>2</sub> gas molecules on five samples: (a) MoS<sub>2</sub>:V<sub>S</sub>, (b) MoS<sub>2</sub>:Mn, (c) MoS<sub>2</sub>:Fe, (d) MoS<sub>2</sub>:Co, and (e) MoS<sub>2</sub>:Ni.

**Figure S4:** The initial and final configurations of relaxing two molecules (NO and N<sub>2</sub>), simultaneously, on MoS<sub>2</sub>:Ni@S surface. NO molecule favors chemisorption on Ni dopant while N<sub>2</sub> molecule remains in a physisorption state. Color of atoms: Mo (cyan), S (yellow), Ni (green), N (blue), O (red).
