# Supplementary material for: Functionalized molybdenum disulfide (MoS2) monolayer as an efficient nanosensor towards toxic nitrogen containing gases
Source: Royal Society of Chemistry journal article supplement (doi:10.1039/d4en00072b), 2024-01-01
Supplement: d4en00072b2.pdf [file d4en00072b2.pdf]

## Supplementary Documents

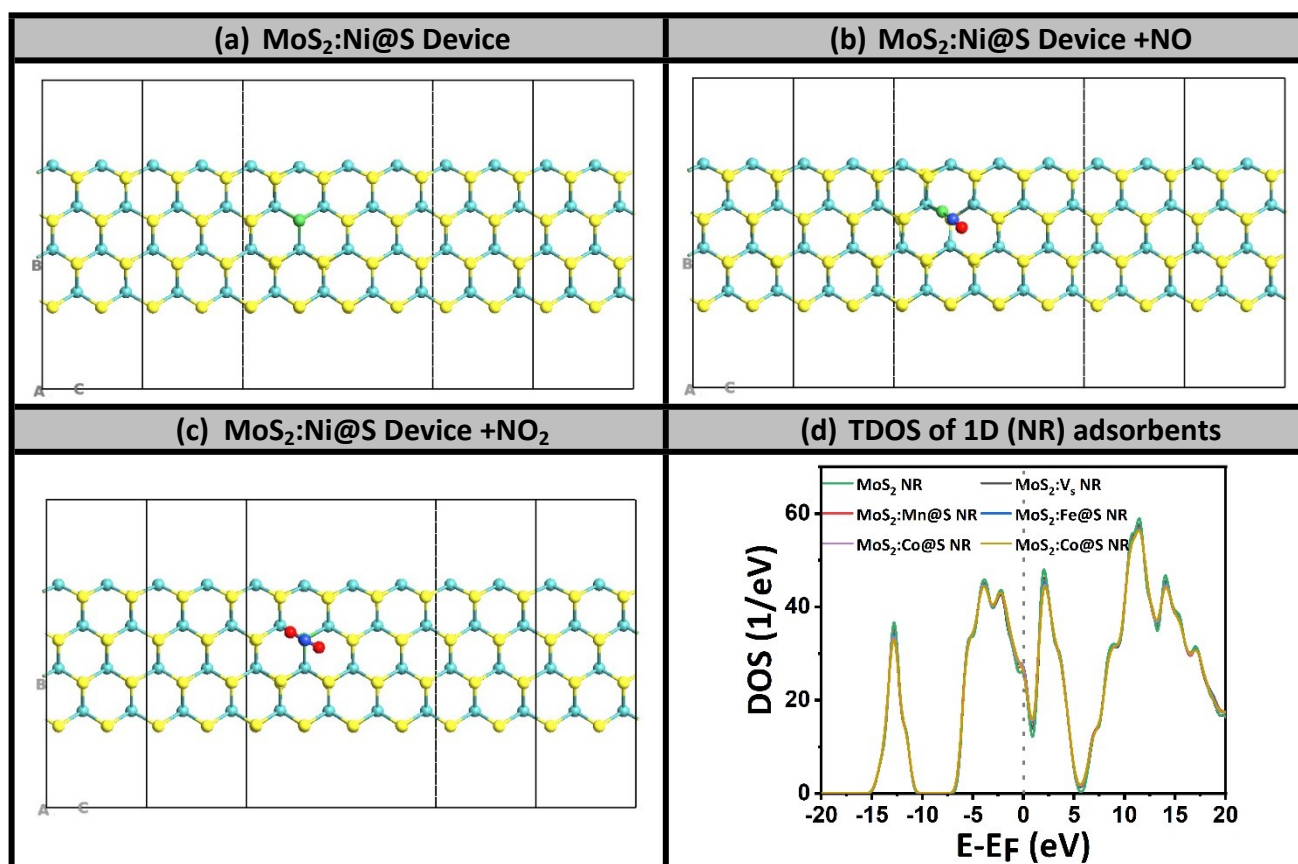

**Figure S1**

## Supplementary Documents

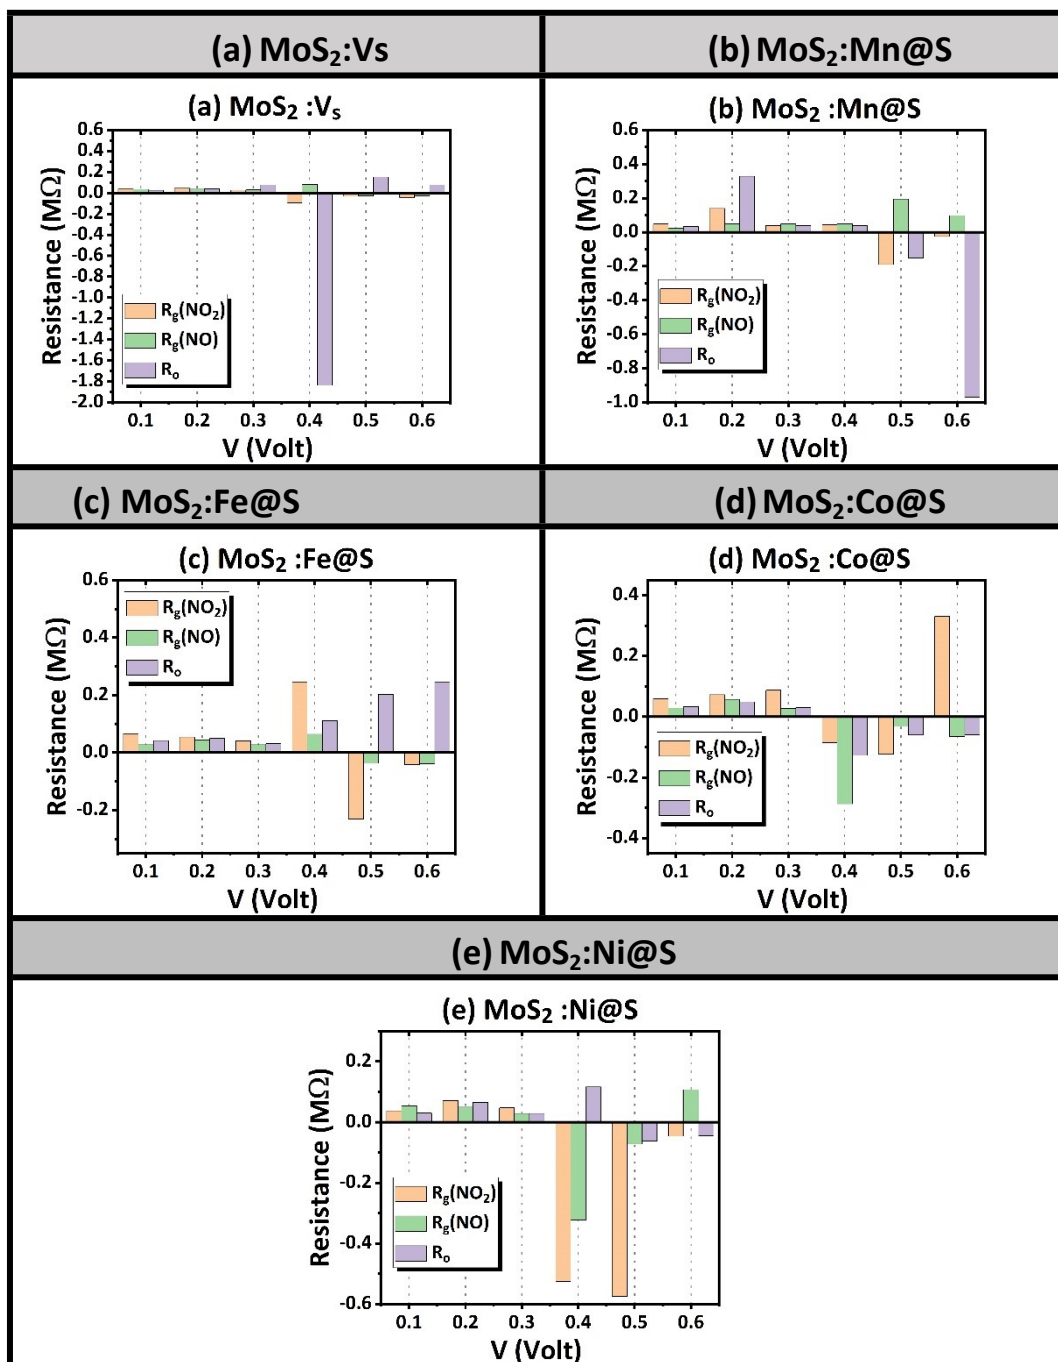

Figure S2

## Supplementary Documents

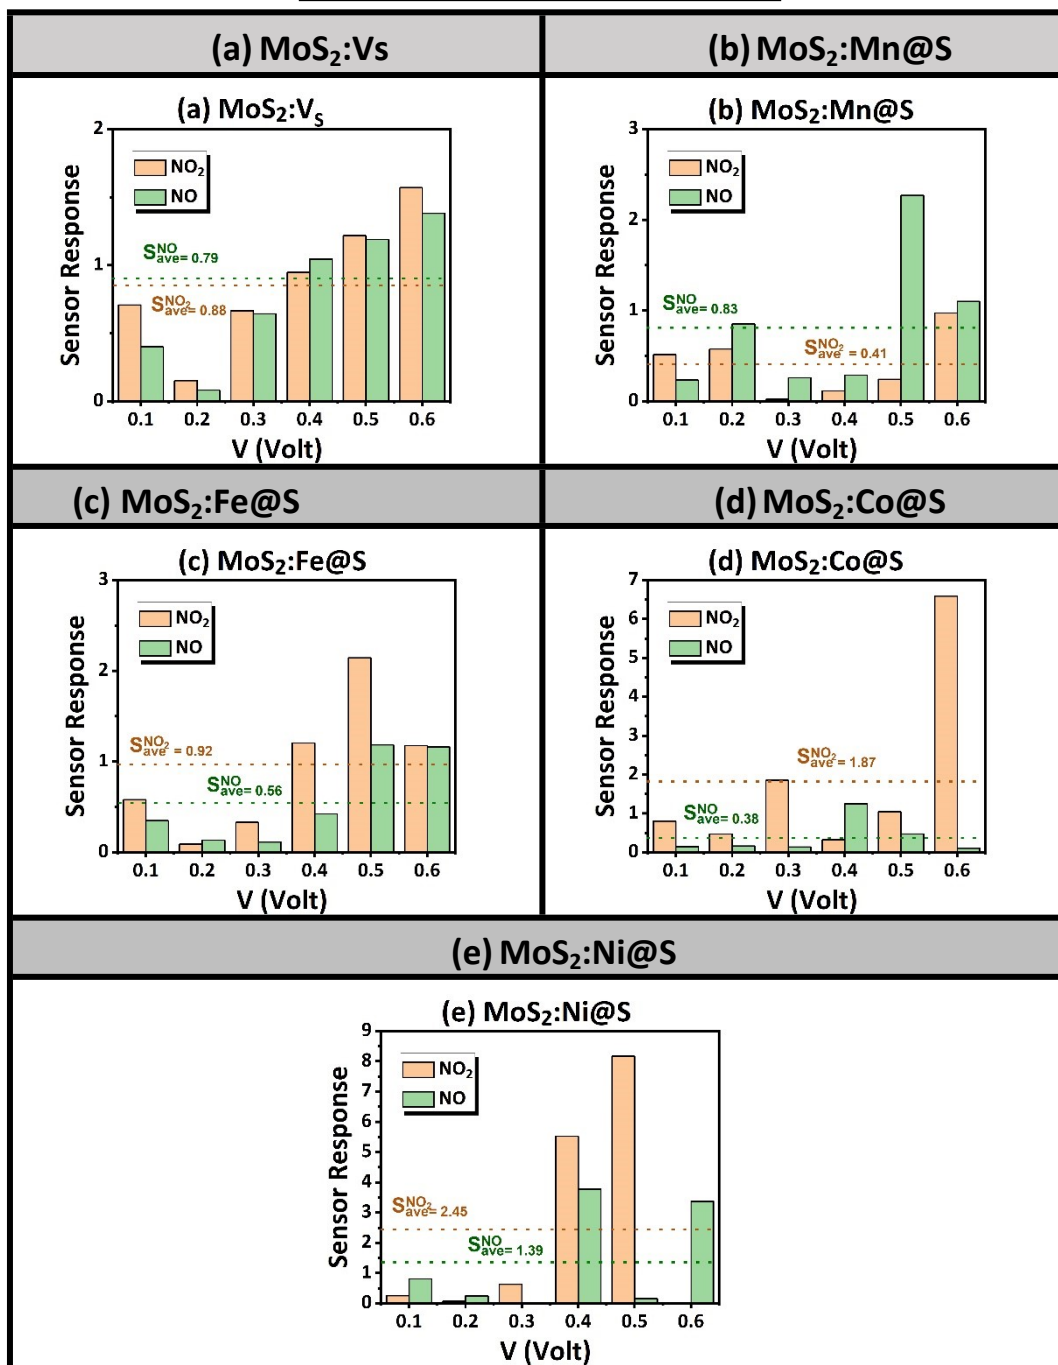

**Figure S3**

## Supplementary Documents

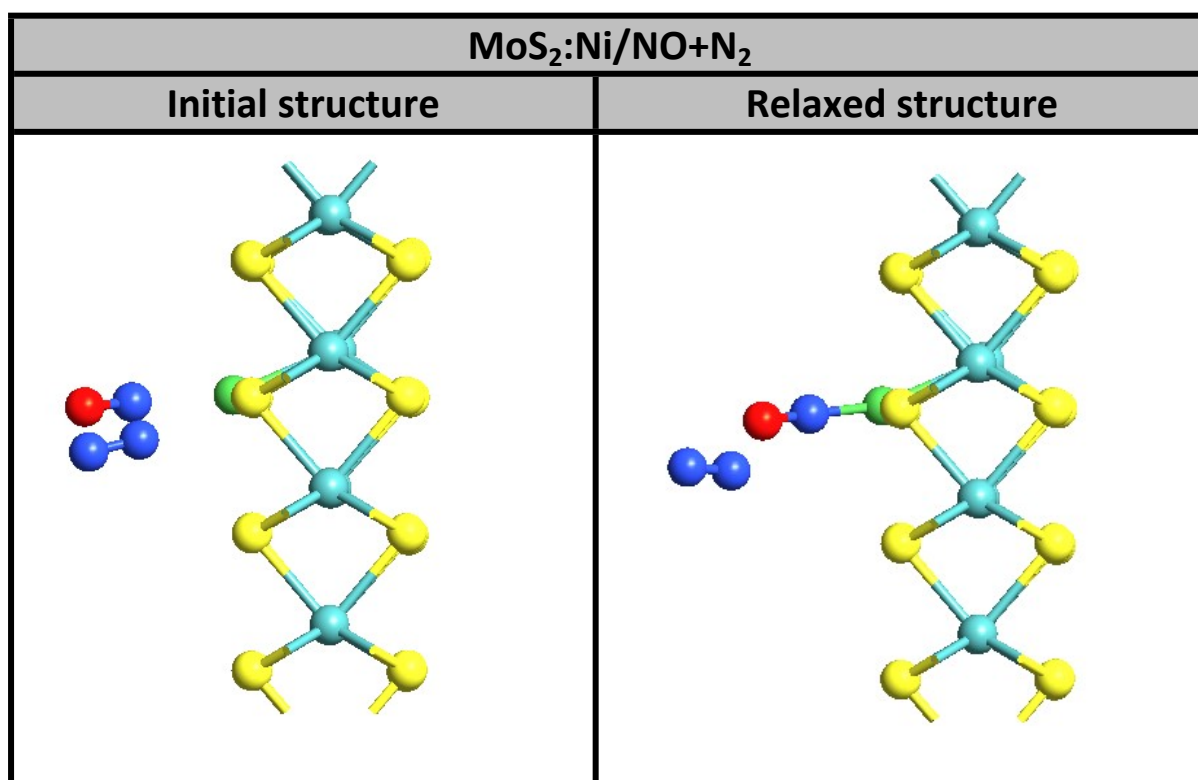

Figure S4

---
